# Supplementary material for: Visible light induced photocatalytic removal of an organic dye using metal doped iron oxide based catalysts derived from red mud
Source: Royal Society of Chemistry journal article supplement (doi:10.1039/d4nj00889h), 2024-01-01
Supplement: d4nj00889h1.pdf [file d4nj00889h1.pdf]

## Electronic Supporting Information

### Visible Light Induced Photocatalytic Removal of Organic Dye Using Metal

### Doped Iron Oxide Based Catalysts Derived from Red Mud

Adwitiya Chakraborty, Soumita Samajdar, Srabanti Ghosh\* and Milan KantiNaskar\*

Central Glass and Ceramic Research Institute (CSIR)

Kolkata 700 032

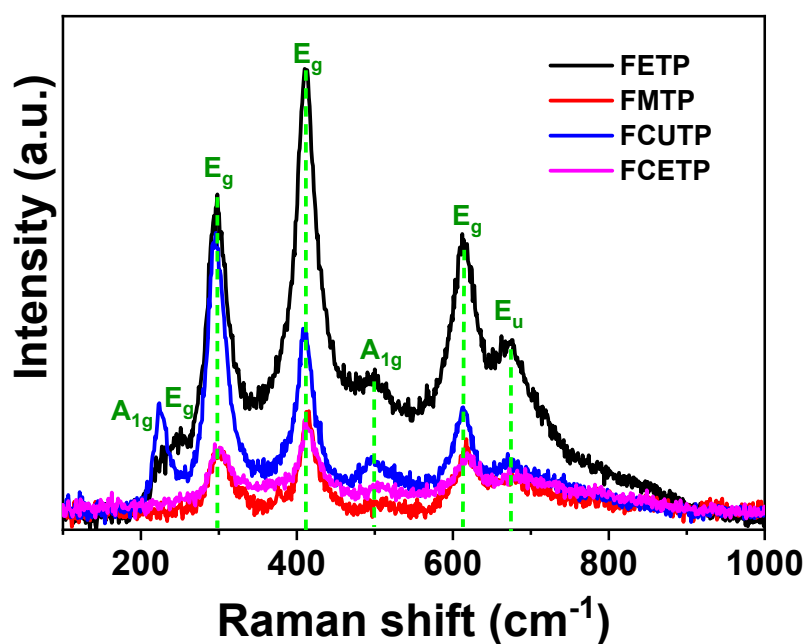

Fig. S1: Raman spectra of  $\alpha$ -Fe<sub>2</sub>O<sub>3</sub> and doped samples.

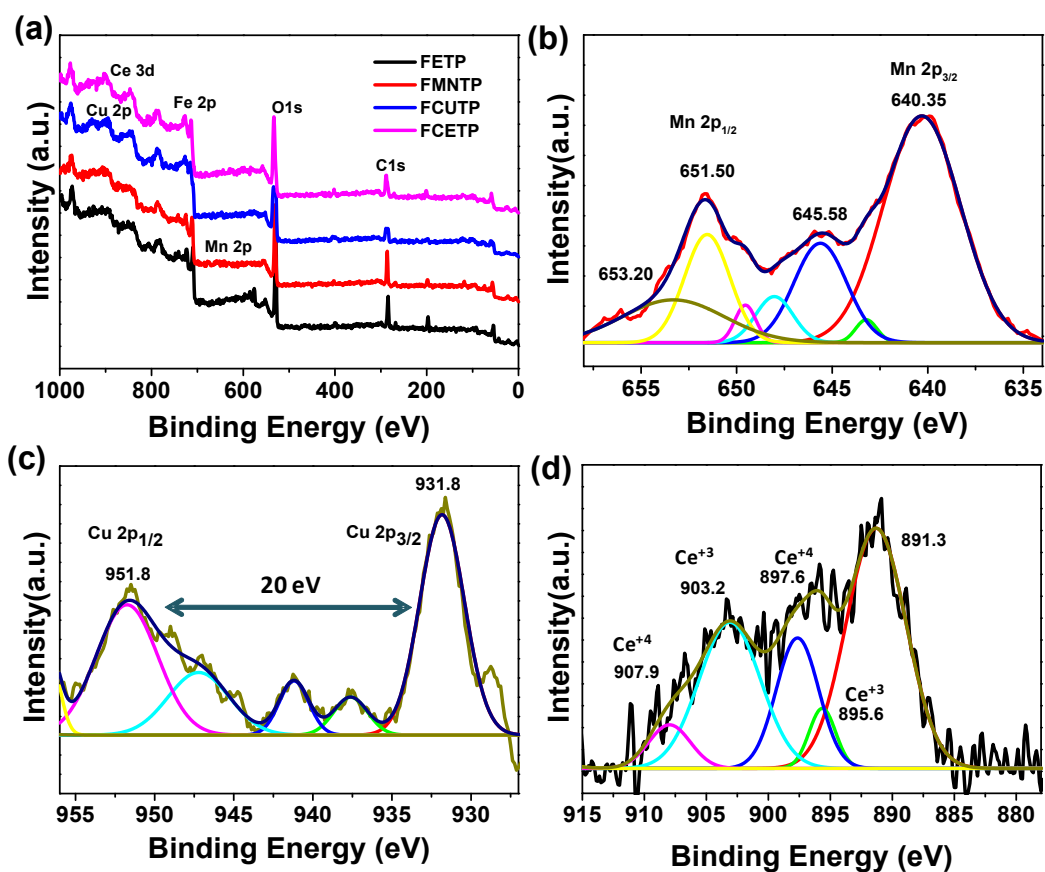

Fig. S2: XPS spectra of a) Survey b) Mn (2p) c) Cu(2p) and d) Ce (3d) for samples FMNTP, FCUTP and FCETP, respectively.

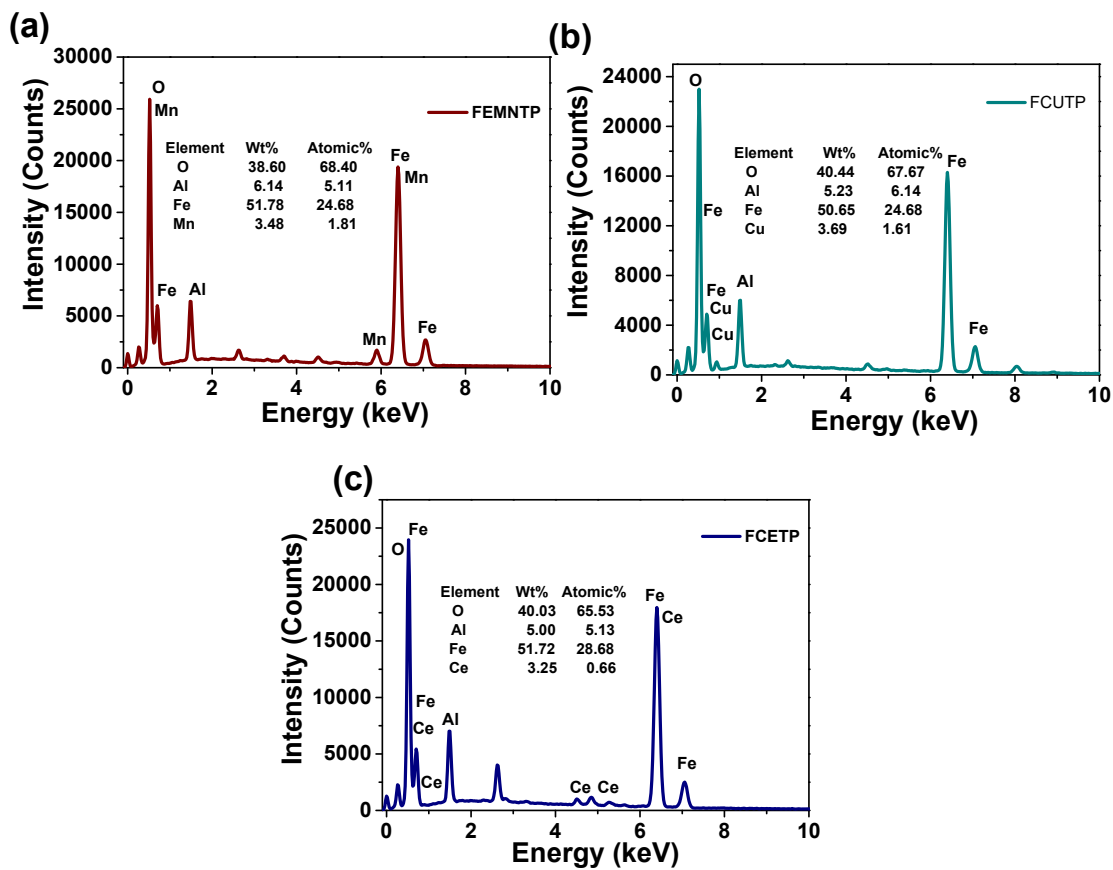

Fig. S3: EDX spectra of a) FMNTP, b) FCUTP and c) FCETP

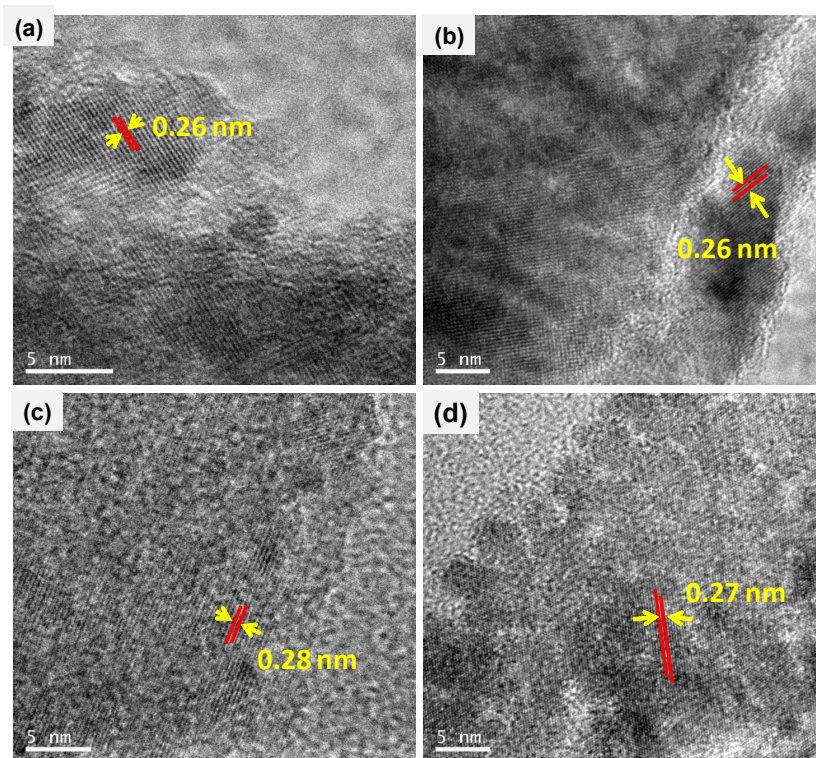

Fig. S4:HRTEM image of a)FETP b) FMNTP c) FCUTP and d) FCETP

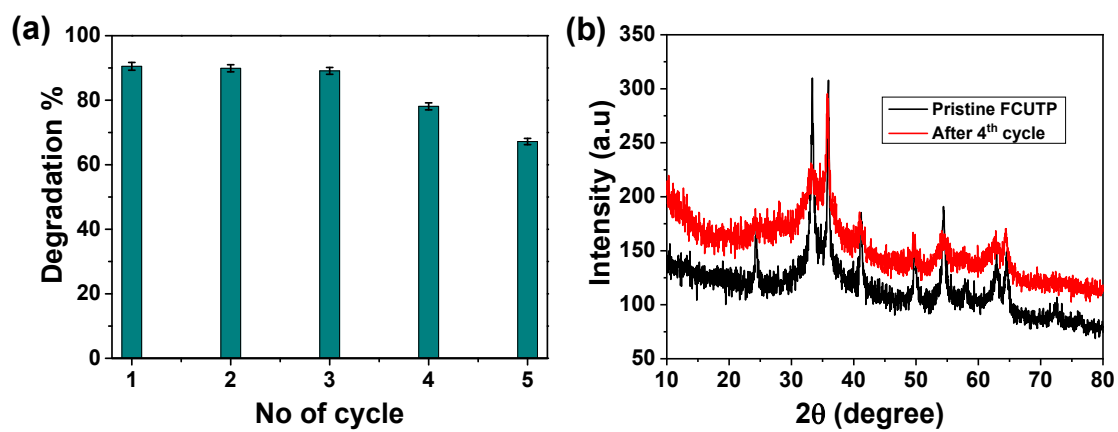

Fig. S5: (a) Recyclability test (b) XRD pattern of FCUTP for photostability test

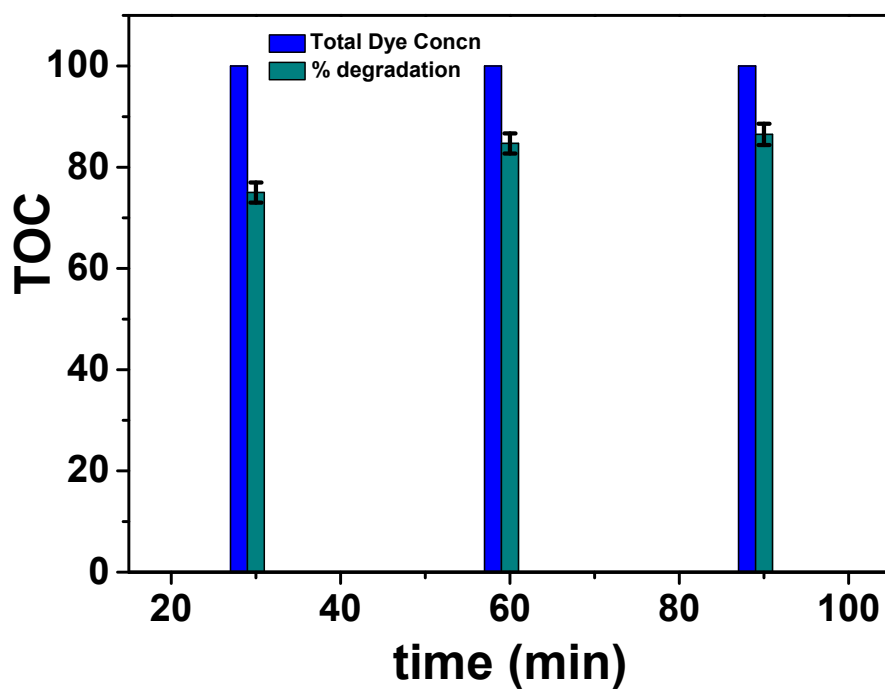

Fig. S6: TOC removal% at different reaction time

Table S1

| Sample ID | $S_{\text{BET}}$ ( $\text{m}^2\text{g}^{-1}$ ) <sup>a</sup> | $V_{\text{p-Total}}$ ( $\text{cm}^3\text{g}^{-1}$ ) <sup>b</sup> | $D_{\text{BJH}}$ (nm) <sup>c</sup> |
|-----------|-------------------------------------------------------------|------------------------------------------------------------------|------------------------------------|
| FETP      | 53.90                                                       | 0.168                                                            | 3.49                               |
| FMNTP     | 51.9                                                        | 0.224                                                            | 3.33                               |
| FCUTP     | 263.9                                                       | 0.35                                                             | 3.70                               |
| FCETP     | 312.5                                                       | 0.111                                                            | 3.50                               |

<sup>a</sup> Specific surface area, <sup>b</sup> Total pore volume, <sup>c</sup> Pore diameter

**Table. S2**

| Sample ID                                                                  | Removal % | Rate constant (min <sup>-1</sup> ) | Ref          |
|----------------------------------------------------------------------------|-----------|------------------------------------|--------------|
| MnTiO <sub>3</sub> /TiO <sub>2</sub> catalyst                              | 76        | 0.005                              | 1            |
| GF/TiO <sub>2</sub> NTA                                                    | 65.9      | 0.008                              | 2            |
| CuO nano particle                                                          | 78        | 0.012                              | 3            |
| Red Mud derived Cudoped $\alpha$ -Fe <sub>2</sub> O <sub>3</sub> catalysts | 90.9      | 0.040                              | Present work |

**Table S3.** Fitting parameters of Nyquist plots

| Material | R <sub>s</sub> /Ω | R <sub>CT</sub> /kΩ | C <sub>CT</sub> /μMho | W/Ω   |
|----------|-------------------|---------------------|-----------------------|-------|
| FETP     | 72.5              | 1950                | 4.5                   | 60100 |
| FMNTP    | 130               | 1511                | 5.6                   | 0.009 |
| FCUTP    | 60.8              | 576                 | 9.0                   | 0.001 |
| FCETP    | 58.3              | 1790                | 4.1                   | 0.006 |

## **References**

- 1) S. Alkaykh, A.Mbarek and E.E. Ali-Shattle,*Heliyon.*,2020,**6**, e03663.

2) X. Cheng, H. Liu, Q. Chen, J. Li and P. Wang, *Carbon*, 2014, **66**, 450–458.

3) G. Sorekine ,G.Anduwan , M.N.Waimbo, H.Osora , S.Velusamy, S. Kim, Y. S. Kim and J.Charles, *Journal of Molecular Structure*, 2022, **1248**, 131487,.
